# Supplementary material for: Cardiac rehabilitation and physical activity: systematic review and meta-analysis
Source: PubMed Central journal article supplement — Heart. 2018 Apr 13;104(17):1394–402. doi: 10.1136/heartjnl-2017-312832 (PMC6109237; doi:10.1136/heartjnl-2017-312832), 2018-04-13
Supplement: heartjnl-2017-312832supp001.pdf [file heartjnl-2017-312832supp001.pdf]

### Supplementary file 1: Search strategy for MEDLINE database

Database(s): **Ovid MEDLINE(R) In-Process & Other Non-Indexed Citations and Ovid MEDLINE(R)** 1946 to

Present

Search Strategy:

| #  | Searches                                                                                                                            | Results |
|----|-------------------------------------------------------------------------------------------------------------------------------------|---------|
| 1  | exp Heart Failure/                                                                                                                  | 113505  |
| 2  | ((heart or cardiac or myocardial or ventricular) adj5 failure).ti,ab.                                                               | 165648  |
| 3  | "congestive heart failure".ti,ab.                                                                                                   | 37916   |
| 4  | ((right-sided or left-sided or diastolic or systolic) adj5 failure).ti,ab.                                                          | 6991    |
| 5  | exp Myocardial Ischemia/                                                                                                            | 432299  |
| 6  | (myocard* adj5 isch*mi*).ti,ab.                                                                                                     | 50649   |
| 7  | exp Heart Diseases/                                                                                                                 | 1109082 |
| 8  | ((((heart or coronary) adj5 disease) or CHD or CAD).ti,ab.                                                                          | 258469  |
| 9  | ("ischemic heart disease" or "ischaemic heart disease" or IHD).ti,ab.                                                               | 33856   |
| 10 | "acute coronary syndrome".ti,ab.                                                                                                    | 16465   |
| 11 | ((myocard* or heart) adj5 infarct*).ti,ab.                                                                                          | 187996  |
| 12 | (atherosclerosis or arteriosclerosis).ti,ab.                                                                                        | 119767  |
| 13 | ("percutaneous coronary intervention*" or PCI).ti,ab.                                                                               | 31306   |
| 14 | angioplasty.ti,ab.                                                                                                                  | 42533   |
| 15 | exp Myocardial Infarction/                                                                                                          | 175310  |
| 16 | stent*.ti,ab.                                                                                                                       | 85371   |
| 17 | exp Angina Pectoris/                                                                                                                | 46071   |
| 18 | angina.ti,ab.                                                                                                                       | 52590   |
| 19 | "angina pectoris".ti,ab.                                                                                                            | 19708   |
| 20 | "stable angina".ti,ab.                                                                                                              | 7629    |
| 21 | revasculari*.ti,ab.                                                                                                                 | 53414   |
| 22 | exp Coronary Artery Bypass/                                                                                                         | 52957   |
| 23 | exp Myocardial Revascularization/                                                                                                   | 92398   |
| 24 | ("coronary artery bypass graft" or "coronary artery bypass surgery" or CABG).ti,ab.                                                 | 26816   |
| 25 | 1 or 2 or 3 or 4 or 5 or 6 or 7 or 8 or 9 or 10 or 11 or 12 or 13 or 14 or 15 or 16 or 17 or 18 or 19 or 20 or 21 or 22 or 23 or 24 | 1456929 |
| 26 | exp Rehabilitation/                                                                                                                 | 193650  |
| 27 | rehabilitat*.ti,ab.                                                                                                                 | 140077  |

|                                                                                                                                        |        |
|----------------------------------------------------------------------------------------------------------------------------------------|--------|
| 28 exp Sports/                                                                                                                         | 170759 |
| 29 sport.ti,ab.                                                                                                                        | 22280  |
| 30 exertion.ti,ab.                                                                                                                     | 14324  |
| 31 exp Exercise/                                                                                                                       | 168685 |
| 32 exercise.ti,ab.                                                                                                                     | 232301 |
| 33 ((lifestyle or life-style or risk factor) adj3 (intervent* or program* or modification or change* or treatment* or therap*)).ti,ab. | 25424  |
| 34 ((physical or exercise or fitness) adj5 (training or therap* or intervent* or program* or treatment* or prescription)).ti,ab.       | 96583  |
| 35 (aerobic adj3 (training or exercise or activit*)).ti,ab.                                                                            | 13005  |
| 36 exp "Physical and Rehabilitation Medicine"/                                                                                         | 23492  |
| 37 "cardiac rehabilitation".ti,ab.                                                                                                     | 5131   |
| 38 "heart rehabilitation".ti,ab.                                                                                                       | 24     |
| 39 "cardio* rehabilitation".ti,ab.                                                                                                     | 431    |
| 40 telerehabilitation.ti,ab.                                                                                                           | 433    |
| 41 telemedicine.ti,ab.                                                                                                                 | 8069   |
| 42 telecare.ti,ab.                                                                                                                     | 580    |
| 43 (prescribed adj2 (exercise or activity)).ti,ab.                                                                                     | 649    |
| 44 26 or 27 or 28 or 29 or 30 or 31 or 32 or 33 or 34 or 35 or 36 or 37 or 38 or 39 or 40 or 41 or 42 or 43                            | 719391 |
| 45 exp Motor Activity/                                                                                                                 | 270112 |
| 46 "physical activity".mp.                                                                                                             | 90007  |
| 47 "physical inactivity".mp.                                                                                                           | 6506   |
| 48 "activity level".mp.                                                                                                                | 10982  |
| 49 ((habitual or leisure or daily) adj3 activity).mp.                                                                                  | 15283  |
| 50 ((lifestyle or life-style) adj2 (activ* or behaviour* or behavior*)).mp.                                                            | 6433   |
| 51 exp "Activities of Daily Living"/                                                                                                   | 66589  |
| 52 "activit* of daily living".mp.                                                                                                      | 74413  |
| 53 (habitual adj3 exercise).mp.                                                                                                        | 533    |
| 54 (exercise adj2 (habit* or participation)).mp.                                                                                       | 2571   |
| 55 (adherence adj2 exercise).mp.                                                                                                       | 1045   |
| 56 (sedentary adj2 (behaviour or behavior or time)).mp.                                                                                | 4821   |
| 57 "energy expenditure".mp.                                                                                                            | 23370  |

|                                                                                                                                                                                                                                                             |        |
|-------------------------------------------------------------------------------------------------------------------------------------------------------------------------------------------------------------------------------------------------------------|--------|
| 58 "risk factor".mp.                                                                                                                                                                                                                                        | 175935 |
| 59 acceleromet*.mp.                                                                                                                                                                                                                                         | 12894  |
| 60 pedomet*.mp.                                                                                                                                                                                                                                             | 2434   |
| 61 IPAQ.mp.                                                                                                                                                                                                                                                 | 774    |
| 62 (step adj2 count*).mp.                                                                                                                                                                                                                                   | 1283   |
| 63 walk*.mp.                                                                                                                                                                                                                                                | 108945 |
| 64 ((direct or indirect) adj2 kalori*).mp.                                                                                                                                                                                                                  | 7768   |
| 65 (MVPA or "moderate-vigorous physical activity" or "moderate to vigorous physical activity").mp.                                                                                                                                                          | 4455   |
| 66 ("doubly labelled water" or "doubly labeled water").mp.                                                                                                                                                                                                  | 1436   |
| 67 "activity monitor".mp.                                                                                                                                                                                                                                   | 1265   |
| 68 45 or 46 or 47 or 48 or 49 or 50 or 51 or 52 or 53 or 54 or 55 or 56 or 57 or 58 or 59 or 60 or 61 or 62 or 63 or 64 or 65 or 66 or 67                                                                                                                   | 657045 |
| 69 exp Randomized Controlled Trial/                                                                                                                                                                                                                         | 508365 |
| 70 ("randomised controlled trial" or "randomized controlled trial").mp.                                                                                                                                                                                     | 530710 |
| 71 "controlled clinical trial".mp.                                                                                                                                                                                                                          | 110323 |
| 72 "clinical trial".mp.                                                                                                                                                                                                                                     | 710202 |
| 73 "controlled trial".mp.                                                                                                                                                                                                                                   | 540481 |
| 74 69 or 70 or 71 or 72 or 73                                                                                                                                                                                                                               | 961974 |
| 75 25 and 44 and 68 and 74                                                                                                                                                                                                                                  | 3707   |
| 76 limit 75 to (("young adult (19 to 24 years)" or "adult (19 to 44 years)" or "young adult and adult (19-24 and 19-44)" or "middle age (45 to 64 years)" or "middle aged (45 plus years)" or "all aged (65 and over)" or "aged (80 and over)") and humans) | 3230   |
