# Supplementary material for: Cardiac rehabilitation and physical activity: systematic review and meta-analysis
Source: PubMed Central journal article supplement — Heart. 2018 Apr 13;104(17):1394–402. doi: 10.1136/heartjnl-2017-312832 (PMC6109237; doi:10.1136/heartjnl-2017-312832), 2018-04-13
Supplement: heartjnl-2017-312832supp003.pdf [file heartjnl-2017-312832supp003.pdf]

## Supplementary References

### Linked papers used in data extraction:

I Houle J, Doyon O, Vadeboncoeur N, et al. Effectiveness of a pedometer-based program using a socio-cognitive intervention on physical activity and quality of life in a setting of cardiac rehabilitation. *Can J Cardiol* 2012;28(1):27-32.

II Dubach P, Myers J, Dziekan G, et al. Effect of exercise training on myocardial remodelling in patients with reduced left ventricular function after myocardial infarction. *Circulation* 1997;95(8):2060-7.

III Ornish D, Brown SE, Scherwitz LW, et al. Can lifestyle changes reverse coronary heart disease? The lifestyle heart trial. *Lancet* 1990;336:129-33.

IV Sandström L, Ståhle, A. Rehabilitation of elderly with coronary heart disease – improvement in quality of life at a low cost. *Advances in Physiotherapy* 2005;7:60-6.

V Hage C, Mattsson E, Ståhle A. Long term effects of exercise training on physical activity level and quality of life in elderly coronary patients – a three- to six-year follow up. *Physiother Res Int* 2003;8(1):13-22.

VI Ståhle A, Mattsson E, Rydén L, et al. Improved physical fitness and quality of life following training of elderly patients after acute coronary events. *Eur Heart J* 1999;20(20):1475-84.

VII Todd IC, Ballantyne D. Antianginal efficacy of exercise training: a comparison with  $\beta$  blockade. *Br Heart J* 1990;64:14-9.

VIII Toobert DJ, Glasgow RE, Radcliffe JL. Physiologic and related behavioural outcomes from the women's lifestyle heart trial. *Ann Behav Med* 2000;22(1):1-9.

IX Wang W, Thompson DR, Chow A, et al. An education booklet to aid cardiac patients' recovery at home. *Int Nurs Rev* 2014;61(2):290-4.

X Witham MD, Gray JM, Argo IS, et al. Effect of a seated exercise program to improve physical function and health status in frail patients  $\geq 70$  years of age with heart failure. *Am J Cardiol* 2005;95:1120-4.

XI Zwisler AD, Schou L, Soja AM, et al. A randomized clinical trial of hospital-based, comprehensive cardiac rehabilitation versus usual care for patients with congestive heart failure, ischemic heart disease, or high risk of ischemic heart disease (the DANREHAB trial) – design, intervention, and population. *Am Heart J* 2005;150(5):899.

### Questionnaires used in studies

XII Craig CL, Marshall AL, Sjostrom M, et al. International physical activity questionnaire: 12-country reliability and validity. *Med Sci Sports Exerc* 2003;35:1381-95.

XIII Taylor HL, Jacobs DR, Schucker B, et al. A questionnaire for the assessment of leisure time physical activities. *J Chron Dis* 1978;31(12):741-55.

- XIV Paffenbarger RS, Wing AI, Hyde RT. Physical activity as an index of heart attack risk in college alumni. *Am J Epidemiol* 1978;108(3):161-75.
- XV Voorrips LE, Ravelli AC, Dongelmans PC, et al. A physical activity questionnaire for the elderly. *Med Sci Sports Exerc* 1991;23(8):974-9.
- XVI Richardson MT, Ainsworth BE, Jacobs DR, et al. Validation of the Stanford 7-day recall to assess habitual physical activity. *Ann Epidemiol* 2001;11(2):145-53.
- XVII Toobert DJ, Hampson SE, Glasgow RE. The summary of diabetes self-care activities measure. *Diabetes Care* 2000;23:943-50.
- XVIII Dipietro L, Caspersen CJ, Ostfeld AM et al. A survey for assessing physical activity among older adults. *Med Sci Sports Exerc* 1993;25(5):628-42.
- XIX Gulanick M, Holm K, Kim M. Psychometric data for self efficacy scales used with recovering cardiac patients. *J Cardiopulm Rehabil* 1987;7:502.
- XX Godin G, Jobin J, Bouillon J. Assessment of leisure time exercise behaviour by self-report: a concurrent validity study. *Can J Public Health* 1986;77:359-62.
- XXI Lindskog BD, Sivarajan ES. A method of evaluation of activity and exercise in a controlled study of early cardiac rehabilitation. *Journal of Cardiac Rehabilitation* 1982;2(2):156-65.
- XXII Thompson DR, Jenkinson C, Roebuck A. Development and validation of a short measure of health status for individuals with acute myocardial infarction: the myocardial infarction dimensional assessment scale (MIDAS). *Qual Life Res* 2002;11(6):535-43.
