# Supplementary material for: Cardiac rehabilitation and physical activity: systematic review and meta-analysis
Source: PubMed Central journal article supplement — Heart. 2018 Apr 13;104(17):1394–402. doi: 10.1136/heartjnl-2017-312832 (PMC6109237; doi:10.1136/heartjnl-2017-312832), 2018-04-13
Supplement: heartjnl-2017-312832supp004.pdf [file heartjnl-2017-312832supp004.pdf]

Table 1: Characteristics of included studies

| Author              | Study design                | Population*                                                                                                                                                                     | Intervention                                                                                                                                                                                                                                                                                                                  | Control                                   |
|---------------------|-----------------------------|---------------------------------------------------------------------------------------------------------------------------------------------------------------------------------|-------------------------------------------------------------------------------------------------------------------------------------------------------------------------------------------------------------------------------------------------------------------------------------------------------------------------------|-------------------------------------------|
| Astengo et al. 2010 | Sweden<br>Multicentre RCT   | CHD – stable angina<br>N=62 (intervention 33, control 29)<br>Age: Intervention 62±7, control 65±8 years<br>Sex: Intervention 21%, control 24% female<br>Ethnicity: not reported | Exercise only<br>Home-based<br>Duration: 250 days (mean), ≥5 sessions/week, ≥30 mins/ session<br>Intensity: approx. 70% maximal capacity.<br>Modality: Exercise bike, allowed to replace cycling with other aerobic training twice per week. Resistance training included.                                                    | Maintain usual sedentary life             |
| Bengtsson 1983      | Sweden<br>Single centre RCT | CHD – MI<br>N=171 (intervention 81, control 90)<br>Age: Intervention: 55.3±6.6, control: 57.1±6.6 years<br>Sex: Intervention 14%, control 16% female<br>Ethnicity: not reported | Comprehensive rehabilitation - Exercise, counselling and social measures<br>Centre-based<br>Duration: 3 months, 2 sessions/week, 30 mins/session<br>Intensity: 90% maximum HR at exercise tolerance test.<br>Modality: Ergometer cycling, calisthenics and jogging. No resistance training.<br>Supervised by physiotherapist. | Usual care                                |
| Bertie et al. 1992  | UK<br>Single centre RCT     | CHD – AMI<br>N=110 (intervention 57, control 53)<br>Age: Intervention 52.1±1.3, control 52.7±1.3 years<br>Sex: not reported<br>Ethnicity: not reported                          | Comprehensive rehabilitation - Exercise, relaxation technique and information reinforcement<br>Centre-based<br>Duration: 4 weeks, 2 sessions /week.<br>Intensity not described.<br>Modality: Pulse monitored, group circuit training, supervised by physiotherapist.                                                          | Standard hospital care                    |
| Borland et al. 2014 | Sweden<br>Single centre RCT | HF<br>Intervention group:<br>NYHA II/III (n=10/14)                                                                                                                              | Exercise only<br>Centre-based<br>Duration: 3 months, 2 sessions/week, 60 mins/session                                                                                                                                                                                                                                         | Asked to continue with their usual lives. |

|                         |                             |                                                                                                                                                                                                                                                                                                                                                                                                                                                                                         |                                                                                                                                                                                                                                                                                                                                                                                                                                                                                                                                                                      |                      |
|-------------------------|-----------------------------|-----------------------------------------------------------------------------------------------------------------------------------------------------------------------------------------------------------------------------------------------------------------------------------------------------------------------------------------------------------------------------------------------------------------------------------------------------------------------------------------|----------------------------------------------------------------------------------------------------------------------------------------------------------------------------------------------------------------------------------------------------------------------------------------------------------------------------------------------------------------------------------------------------------------------------------------------------------------------------------------------------------------------------------------------------------------------|----------------------|
|                         |                             | <p>LVEF 26±10. Control group:<br/>         NYHA II/III (n=11/12)<br/>         LVEF 27±11<br/>         N=48 (intervention 25, control 23)<br/>         Age: Intervention: 70±6, control:<br/>         71±9 years<br/>         Sex: Intervention 25%, control 28%<br/>         female<br/>         Ethnicity: not reported</p>                                                                                                                                                            | <p>Intensity: Borg RPE 12-13 and/or Category<br/>         ratio scale, dyspnoea 2-3.<br/>         Modality: peripheral muscle training,<br/>         aerobic exercise on ergometer cycle and<br/>         balance exercises. Resistance training<br/>         included. Supervision not described.</p>                                                                                                                                                                                                                                                               |                      |
| Carlsson et al.<br>1997 | Sweden<br>Single centre RCT | <p>CHD – AMI<br/>         N=168 (intervention 87, control 81)<br/>         Age: Intervention: 62.2, control: 61.9<br/>         years (SD not reported)<br/>         Sex: Intervention 25%, control 25%<br/>         female<br/>         Ethnicity: not reported</p>                                                                                                                                                                                                                     | <p>Comprehensive rehabilitation - Exercise<br/>         and education<br/>         Centre-based<br/>         Duration: 10-12 weeks, 2-3 sessions/week,<br/>         40 mins/session.<br/>         Intensity: not reported<br/>         Modality: interval training, cycling and<br/>         jogging. Supervision not reported.</p>                                                                                                                                                                                                                                  | Usual care           |
| Cowie et al.<br>2011    | UK<br>Single centre RCT     | <p>HF<br/>         NYHA II/III (37(62%)/23(38%)<br/>         LV impairment: Mild, n=0, Mild-<br/>         moderate, n=0, Moderate,<br/>         n=8(13%), Moderate-Severe,<br/>         n=17(29%), Severe, n=35(58%)<br/>         N=60 (home intervention 20,<br/>         hospital intervention 20, control 20)<br/>         Age: Home: 65.5 (35-82), Hospital:<br/>         71.2 (59-85), Control: 61.4 (39-79)<br/>         Sex: 15% female<br/>         Ethnicity: not reported</p> | <p>Comprehensive rehabilitation - Exercise<br/>         and some education on symptoms of<br/>         unstable HF<br/>         Home-based or centre-based<br/>         Duration: 8 weeks, 2 sessions/week, 60<br/>         mins/session.<br/>         Intensity: 40-60% HRR, or 12-13 Borg RPE<br/>         Modality: Aerobic exercise, circuit training.<br/>         Resistance exercise not included. Hospital<br/>         group supervised by physiotherapist, home<br/>         group given DVD and physiotherapist<br/>         contact every two weeks.</p> | Usual care           |
| DeBusk et al.<br>1979   | USA<br>Multicentre RCT      | <p>CHD – MI<br/>         N=70 (gym intervention 28, home<br/>         intervention 12, control 30)</p>                                                                                                                                                                                                                                                                                                                                                                                  | <p>Exercise only<br/>         Centre-based or home-based<br/>         Duration: 8 weeks, gym group 3<br/>         sessions/week and 60 minutes/session,</p>                                                                                                                                                                                                                                                                                                                                                                                                          | No exercise training |

|                        |                                  |                                                                                                                                                                                                                                                                     |                                                                                                                                                                                                                                                                                                                                                                                |                                                                         |
|------------------------|----------------------------------|---------------------------------------------------------------------------------------------------------------------------------------------------------------------------------------------------------------------------------------------------------------------|--------------------------------------------------------------------------------------------------------------------------------------------------------------------------------------------------------------------------------------------------------------------------------------------------------------------------------------------------------------------------------|-------------------------------------------------------------------------|
|                        |                                  | Age: Gym: 52±8, Home: 55±7,<br>Control: 54±8 years<br>Sex: 0 female<br>Ethnicity: not reported.                                                                                                                                                                     | home group 7 sessions/week and 40 minutes/session.<br>Intensity: 70-85% peak HR attained during cycle testing.<br>Modality: Gym group – calisthenics, walking, jogging and stationary cycling.<br>Home group – stationary cycling.<br>Resistance training not included.                                                                                                        |                                                                         |
| Devi et al.<br>2014    | UK<br>Multicentre RCT            | CHD – stable angina<br>N=94 (intervention 48, control 46)<br>Age: Intervention 66.27±8.35,<br>control: 66.20±10.06 years<br>Sex: Intervention 29%, control 22% female<br>Ethnicity: Intervention 92% white British, 8% other, Control: 91% white British, 9% other. | Comprehensive rehabilitation – education on secondary prevention of CHD and goal setting for PA, diet, managing emotions and smoking.<br>Home-based – online program<br>Duration: 6 weeks, encouraged to log into program 3-4 times per week.<br>Intensity: not reported.<br>Modality: individualized tailored goals focussed on exercise, access to cardiac nurses via email. | Usual treatment from GP                                                 |
| Engblom et al.<br>1992 | Finland<br>Single centre RCT     | CHD – CABG<br>N=201 (intervention 93, control 78)<br>Age: Intervention: 54±6, Control: 54±6 years<br>Sex: 0 female<br>Ethnicity: not reported                                                                                                                       | Comprehensive rehabilitation - exercise, education, relaxation training and psychosocial<br>Centre-based<br>Duration: 8 months, sessions/week and time/session not described<br>Intensity: 70% HR achieved during exercise test<br>Modality: floor and swimming pool gymnastics, cycle ergometer, swimming and ball games, resistance training included. Supervised exercise.  | Reference, hospital based treatment, with written information provided. |
| Erdman et al.<br>1986  | Netherlands<br>Single centre RCT | CHD – MI, CABG and severe stable angina                                                                                                                                                                                                                             | Exercise only<br>Centre-based                                                                                                                                                                                                                                                                                                                                                  | Home rehabilitation – patients received a                               |

|                        |                            |                                                                                                                                                                                                                                                                                                                                                                                  |                                                                                                                                                                                                                                                                                                                                                                                                          |                                                                                         |
|------------------------|----------------------------|----------------------------------------------------------------------------------------------------------------------------------------------------------------------------------------------------------------------------------------------------------------------------------------------------------------------------------------------------------------------------------|----------------------------------------------------------------------------------------------------------------------------------------------------------------------------------------------------------------------------------------------------------------------------------------------------------------------------------------------------------------------------------------------------------|-----------------------------------------------------------------------------------------|
|                        |                            | <p>N=80 (intervention 40, control 40)<br/> Age: 51 (range 35-60)<br/> Sex: 0 females<br/> Ethnicity: not reported</p>                                                                                                                                                                                                                                                            | <p>Duration: 6 months, 2 sessions/week, 90 minutes/session<br/> Intensity: Not reported<br/> Modality: Gymnastics, jogging and sports such as volleyball, soccer and hockey. No resistance training included. Supervised by cardiologist.</p>                                                                                                                                                            | <p>brochure with guidelines and advice about physical fitness training and jogging.</p> |
| Gottlieb et al. 1999   | USA<br>Single centre RCT   | <p>HF<br/> Intervention group: NYHA class II 45%, NYHA class III 55%, LVEF 22±8.<br/> Control group: NYHA class II 29%, Class III 71%, LVEF 25±10<br/> N= 33 (intervention 17, control 16)<br/> Age: Intervention: 67±7, Control: 64±10 years<br/> Sex: Intervention 0, control 21% female<br/> Ethnicity: Intervention: Black 73%, White 27%, Control: Black 71%, White 29%</p> | <p>Exercise only<br/> Centre-based<br/> Duration: 6 months, 3 sessions/week, goal of 30 minutes/session<br/> Intensity: Borg RPE 12-13<br/> Modality: Initially rode a Schwinn Aerdyne bike, gradually introduced to walking on a treadmill. Final exercise program consisted of 15ft on bike and 30ft on treadmill. Resistance training not included. Supervised by nurse or exercise physiologist.</p> | <p>Usual care</p>                                                                       |
| Gulanick 1991          | USA<br>Single centre RCT   | <p>CHD – MI or cardiac surgery patients<br/> N= 40 (intervention (1) – 11, intervention (2) – 15, control - 14)<br/> Age: 57±11.3<br/> Sex: 30% female<br/> Ethnicity: not reported</p>                                                                                                                                                                                          | <p>(1) Comprehensive rehabilitation – exercise and education<br/> (2) Education only<br/> Hospital based<br/> Duration: 5 weeks, 3 sessions/week, 30 minutes/session.<br/> Intensity: 70-80% maximum HR response<br/> Modality: not described. Supervised by cardiac rehabilitation staff.</p>                                                                                                           | <p>Usual care</p>                                                                       |
| Hämäläinen et al. 1989 | Finland<br>Multicentre RCT | <p>CHD – AMI<br/> N=375 (intervention 188, control 187)<br/> Age: &lt;65 years</p>                                                                                                                                                                                                                                                                                               | <p>Comprehensive rehabilitation – exercise, education (smoking, dietary and physical activation advice) and psychosocial</p>                                                                                                                                                                                                                                                                             | <p>FU by patients own doctors and did not participate in any</p>                        |

|                       |                                |                                                                                                                                                                                            |                                                                                                                                                                                                                                                                                                                                                                              |                                                                                                                                                                           |
|-----------------------|--------------------------------|--------------------------------------------------------------------------------------------------------------------------------------------------------------------------------------------|------------------------------------------------------------------------------------------------------------------------------------------------------------------------------------------------------------------------------------------------------------------------------------------------------------------------------------------------------------------------------|---------------------------------------------------------------------------------------------------------------------------------------------------------------------------|
|                       |                                | Sex: 25% female<br>Ethnicity: not reported                                                                                                                                                 | discussions<br>Centre-based<br>Duration: 3 months, sessions/week and minutes/session not described.<br>Intensity: not described<br>Modality: not described. Supervised exercise in one centre only.                                                                                                                                                                          | organized rehabilitation programmes                                                                                                                                       |
| Hambrecht et al. 1993 | Germany<br>Single centre RCT   | CHD – Stable angina<br>N=88 (intervention 45, control 43)<br>Age: Intervention: 53±6, control 54±7 years<br>Sex: 0 females<br>Ethnicity: not reported                                      | Exercise only<br>Initially hospital based, then home-based<br>Duration: 12 months, 7 sessions/week, <30 minutes/session.<br>Intensity: 75% VO <sub>2</sub> max HR<br>Modality: cycle ergometer and group training (jogging, calisthenics and ball games). Resistance training not included. Hospital exercise was supervised, home exercise was not.                         | 1 week on ward, received instructions about necessity of regular physical activity and ways of lowering fat consumption. Then received usual care from private physician. |
| Heath et al., 1987    | USA<br>Single centre RCT       | CHD – CABG<br>N=65 (home exercise 17, group exercise 28, control 20)<br>Age: Control: 63±6, Home exercise: 56±11, Group exercise: 58±8 years<br>Sex: 25% female<br>Ethnicity: not reported | Exercise only<br>Home-based or centre-based<br>Duration: 12 weeks, 5 sessions/week, 30-40 minutes exercise/session (90 minutes supervised group sessions)<br>Intensity: 70-100% peak heart rate during treadmill test, and 13-15 Borg RPE scale.<br>Modality: walking, stationary cycling or similar. Resistance training not included. Group sessions only were supervised. | No exercise                                                                                                                                                               |
| Higgins et al. 2001   | Australia<br>Single centre RCT | CHD – post PCI<br>N=105 (intervention 54, control 51)<br>Age: Intervention: 48 (range 31-63), Control: 47 (range 26-63) years<br>Sex: Intervention 17%, control 4% female                  | Comprehensive rehabilitation - Exercise, education and psychosocial support<br>Home-based<br>Duration: 12 months, sessions/week and minutes/session not described<br>Intensity: moderate, RPE guided.                                                                                                                                                                        | Standard care and telephone follow up                                                                                                                                     |

|                        |                                |                                                                                                                                                                                                               |                                                                                                                                                                                                                                                                                                                                                                       |                                                                                            |
|------------------------|--------------------------------|---------------------------------------------------------------------------------------------------------------------------------------------------------------------------------------------------------------|-----------------------------------------------------------------------------------------------------------------------------------------------------------------------------------------------------------------------------------------------------------------------------------------------------------------------------------------------------------------------|--------------------------------------------------------------------------------------------|
|                        |                                | Ethnicity: not reported                                                                                                                                                                                       | Modality: Walking program with graded increase in frequency in duration of exercise. No resistance training. Clinician made 3 home visits and monthly telephone calls.                                                                                                                                                                                                |                                                                                            |
| Houle et al. 2011      | Canada<br>Multicentre RCT      | CHD – ACS<br>N=65 (intervention 32, control 33)<br>Age: Intervention: 58±8, Control: 59±9 years<br>Sex: Intervention 19%, control 24% female<br>Ethnicity: not reported                                       | Comprehensive rehabilitation – pedometer based programme, exercise (daily step target), education regarding PA, and psychosocial support<br>Home-based<br>Duration: 12 months, sessions/week and minutes/session not described.<br>Intensity: moderate according to Borg RPE scale<br>Modality: walking. Resistance training not included, and exercise unsupervised. | Usual care (no restriction to go to centre based CR or consult a health care professional) |
| Lidell & Fridlund 1996 | Sweden<br>Single Centre RCT    | CHD – MI<br>N=116 (intervention 53, control 63)<br>Age: Intervention: 55, Control: 57.6 years (SD not reported)<br>Sex: Intervention 13.2%, control 12.7% female<br>Ethnicity: not reported                   | Exercise and education<br>Centre and home-based<br>Duration: 6 months, 1 session/week plus home exercise, 120 minutes/session (60 mins exercise).<br>Intensity: not described<br>Modality: bicycle ergometer and calisthenics. Resistance not included.<br>Supervision not described.                                                                                 | Usual care                                                                                 |
| Maddison et al. 2015   | New Zealand<br>Multicentre RCT | CHD - Ischaemic heart disease<br>Heart attack – 74%, Angina – 50%<br>N=171 (intervention 85, control 86)<br>Age: Intervention: 61.4±8.9, Control: 59.0±9.5 years<br>Sex: intervention 19%, control 19% female | Exercise only<br>Home-based<br>Duration: 24 weeks, at least 5 sessions/week, at least 30 mins/session<br>Intensity: moderate to vigorous<br>Modality: aerobic based activity, resistance training not included. No supervision.                                                                                                                                       | Usual care with encouragement to be physically active and attend a cardiac club            |

|                       |                                  |                                                                                                                                                                                                  |                                                                                                                                                                                                                                                                                                                                                                                  |                                   |
|-----------------------|----------------------------------|--------------------------------------------------------------------------------------------------------------------------------------------------------------------------------------------------|----------------------------------------------------------------------------------------------------------------------------------------------------------------------------------------------------------------------------------------------------------------------------------------------------------------------------------------------------------------------------------|-----------------------------------|
|                       |                                  | Ethnicity: Intervention group - NZ Maori – 7%, Pacific – 6%, Asian – 9%, NZ European/other – 78%<br>Control group - NZ Maori – 8%, Pacific – 6%, Asian – 10%, NZ European/other – 76%            |                                                                                                                                                                                                                                                                                                                                                                                  |                                   |
| Mueller et al. 2007   | Switzerland<br>Single centre RCT | HF<br>(LVEF <40%)<br>N=50 (intervention 25, control 25)<br>Age: 55.0 ± 10 years<br>Sex: 0 females<br>Ethnicity: not described                                                                    | Comprehensive rehabilitation - Exercise, education and diet<br>Centre-based<br>Duration: 1 month, 5 cycling and 14 walking sessions/week, 30 mins per cycling session, 45 minutes per walking session<br>Intensity: 60-80% HRR and work rate, 12-14 RPE Borg Scale<br>Modality: walking and indoor cycling. No resistance training. Supervised by physician or medical resident. | Usual care                        |
| Naser et al. 2008     | Iran<br>Single centre RCT        | CHD – First MI<br>N=100 (intervention 50, control 50)<br>Age: Intervention: 53.2, Control: 54.8 years (SD not reported)<br>Sex: intervention 10%, control 22% female.<br>Ethnicity: not reported | Comprehensive rehabilitation - exercise, lifestyle counselling<br>Centre-based<br>Duration: 2 years, 2 sessions/week, reducing to 1 session/week from month 2 onwards. 60 mins/session<br>Intensity: not reported<br>Modality: heart targeting aerobic exercise. Resistance training not included. Supervised by program manager and exercise leader.                            | Usual care                        |
| Oldenberg et al. 1995 | Australia<br>Single centre RCT   | CHD – CABG<br>N=91 (intervention 43, control 43)<br>Age: Intervention: 60±7.1, Control: 59±8.1 years                                                                                             | Comprehensive rehabilitation – exercise, education (focussed on key areas of CVD risk) and psychologist led support<br>Centre-based                                                                                                                                                                                                                                              | Standard medical and nursing care |

|                       |                               |                                                                                                                                                                                           |                                                                                                                                                                                                                                                                                                                                                                                                |            |
|-----------------------|-------------------------------|-------------------------------------------------------------------------------------------------------------------------------------------------------------------------------------------|------------------------------------------------------------------------------------------------------------------------------------------------------------------------------------------------------------------------------------------------------------------------------------------------------------------------------------------------------------------------------------------------|------------|
|                       |                               | Sex: intervention 7%, control 12% female<br>Ethnicity: not reported                                                                                                                       | Duration: 12 months, 6 weekly meetings, which began between 4 and 8 weeks following hospital discharge and booster sessions at 8 months and 1 year post baseline. 3 hours/session<br>Intensity: not described<br>Modality: Stretching, calisthenics, cycle ergometer and walking. Resistance training not included. Supervised by physiotherapist and registered nurse.                        |            |
| Oliveira et al. 2014  | Portugal<br>Single centre RCT | CHD – AMI<br>N=96 (intervention 49, control 47)<br>Age: Intervention: 54.8 ± 10.6, Control: 58.6 ± 10.7 years<br>Sex: intervention 14.9%, control 17.8% female<br>Ethnicity: not reported | Exercise only<br>Centre-based<br>Duration: 8 weeks, 3 sessions/week, 50 mins/session.<br>Intensity: 70-85% maximal heart rate achieved in the exercise test<br>Modality: Aerobic exercise, cycle ergometer or treadmill. No resistance training. Supervised exercise.                                                                                                                          | Usual care |
| Ornish et al. 1998    | USA<br>Multicentre RCT        | CHD<br>N=48 (intervention 28, control 20)<br>Age: Intervention: 56.1 ± 7.5, Control: 59.8 ± 9.1 years<br>Sex: intervention 5%, control 21% female<br>Ethnicity: not reported              | Comprehensive rehabilitation - exercise, stress management, psychosocial support, education and diet<br>Centre-based<br>Duration: 5 years, up to 6 sessions/week, at least 30 mins/session<br>Intensity: 50-80% of max heart rate achieved during treadmill test or age-adjusted maximum.<br>Modality: Aerobic exercise, typically walking. No resistance training. Supervision not described. | Usual care |
| Otterstad et al. 2003 | Norway<br>Single centre RCT   | CHD – AMI, UAP, PCI or CABG<br>N=197 (intervention 98, control 99)                                                                                                                        | Comprehensive rehabilitation – exercise, dietary advice, smoking cessation, physical                                                                                                                                                                                                                                                                                                           | Usual care |



|                     |                                  |                                                                                                                                                                                                    |                                                                                                                                                                                                                                                                                                                                                                                                                                                             |            |
|---------------------|----------------------------------|----------------------------------------------------------------------------------------------------------------------------------------------------------------------------------------------------|-------------------------------------------------------------------------------------------------------------------------------------------------------------------------------------------------------------------------------------------------------------------------------------------------------------------------------------------------------------------------------------------------------------------------------------------------------------|------------|
|                     |                                  | Age: Intervention: 54 ± 8, Control: 55 ± 8 years<br>Sex: intervention 19%, control 16% female<br>Ethnicity: not reported                                                                           | activity counselling, risk factor management, psychosocial management and health education.<br>Centre-based<br>Duration: 2 years, 2 sessions/week, 1 hour/session<br>Intensity: First 6 weeks: 11-13 Borg RPE scale. Following 9 weeks: 13-15 Borg RPE scale.<br>Modality: dynamic endurance training. Resistance training not included. Supervised by physiotherapist for first 15 weeks, then encouraged to exercise at home alone or in organised groups |            |
| Reid et al. 2011    | Canada<br>Multicentre RCT        | CHD – MI and PCI<br>N= 223 (intervention 115, control 108)<br>Age: Intervention: 56.7 ± 9.0, Control: 56.0 ± 9.0 years<br>Sex: intervention 15.7%, control 13.9% female<br>Ethnicity: not reported | Exercise only<br>Home-based (internet)<br>Duration: 6 months, daily activity, minutes/session not reported<br>Intensity: not described<br>Modality: not described, not supervised.                                                                                                                                                                                                                                                                          | Usual care |
| Ribeiro et al. 2012 | Portugal<br>Single centre RCT    | CHD – First MI<br>N= 42 (intervention 22, control 20)<br>Age: Intervention: 54.3 ± 10.8, Control: 57.0 ± 7.6 years<br>Sex: intervention 10%, control 27.8% female<br>Ethnicity: not reported       | Exercise only<br>Centre-based<br>Duration: 8 weeks, 3 sessions/week, 55 mins/session<br>Intensity: 65-75% maximal heart rate achieved during exercise test.<br>Modality: Aerobic exercise, cycle ergometer or treadmill. No resistance training. Exercise supervised.                                                                                                                                                                                       | Usual care |
| Senden et al. 2005  | Netherlands<br>Single centre RCT | HF<br>NYHA class II/III                                                                                                                                                                            | Exercise only<br>Home and centre based                                                                                                                                                                                                                                                                                                                                                                                                                      | Usual care |

|                       |                             |                                                                                                                                                                                                                                                                                                                  |                                                                                                                                                                                                                                                                                                                                                                                                                                                                                                                                                             |                                                            |
|-----------------------|-----------------------------|------------------------------------------------------------------------------------------------------------------------------------------------------------------------------------------------------------------------------------------------------------------------------------------------------------------|-------------------------------------------------------------------------------------------------------------------------------------------------------------------------------------------------------------------------------------------------------------------------------------------------------------------------------------------------------------------------------------------------------------------------------------------------------------------------------------------------------------------------------------------------------------|------------------------------------------------------------|
|                       |                             | <p>Intervention group: LVEF <math>27.9 \pm 8.3\%</math><br/> Control group: LVEF <math>26 \pm 7\%</math><br/> N= 77 (intervention 44, control 33)<br/> Age: <math>59.8 \pm 9.3</math> years<br/> Sex: Intervention 20%, control 31% female<br/> Ethnicity: not reported</p>                                      | <p>Duration: 26 weeks, at least 4 sessions/week (2 home, 2 centre), home sessions 11 minutes, centre sessions 1 hour<br/> Intensity: Cycle ergometer: 50% of maximum short-term exercise performance determined by steep ramp test. Adjusted version of home training programme: &gt;70% peak HR measured during steep ramp test.<br/> Modality: Aerobic interval training (stationary running or cycle ergometer), with strength, flexibility and coordination exercises. Resistance training included. Centre sessions supervised by physiotherapist.</p> |                                                            |
| Sivarajan et al. 1982 | USA<br>Multicentre RCT      | <p>CHD – MI<br/> N=258 (intervention 1: 88, intervention 2: 86, control: 84)<br/> Age: Intervention 1: <math>55.6 \pm 9.3</math>, Intervention 2: <math>56.3 \pm 8.3</math>, Control: <math>57.1 \pm 7.3</math> years<br/> Sex: &lt;20% female in each group<br/> Ethnicity: &gt;80% Caucasian in each group</p> | <p>Intervention 1 – exercise only, intervention 2 – Comprehensive rehabilitation – exercise, education sessions and teaching-counselling<br/> Home-based<br/> Duration: 3 months, 2 sessions per week, reducing to 1 once patient has returned to work. Minutes per session not described<br/> Intensity: progressive, no further information<br/> Modality: Calisthenics and walking. Resistance training not included. No supervision.</p>                                                                                                                | Conventional medical and nursing management                |
| Ståhle et al. 1999    | Sweden<br>Single centre RCT | <p>CHD (some HF patients) – ACS<br/> N=101 (intervention 50, control 51)<br/> Age: Intervention: <math>71 \pm 3.9</math>, Control: <math>71 \pm 4.7</math> years</p>                                                                                                                                             | <p>Exercise only<br/> Centre-based<br/> Duration: 3 months, 3 sessions/week, 50 mins/session</p>                                                                                                                                                                                                                                                                                                                                                                                                                                                            | Usual care – instructed to restart usual physical activity |

|                        |                          |                                                                                                                                                                                                                                                                       |                                                                                                                                                                                                                                                                                                                                                                                                                     |            |
|------------------------|--------------------------|-----------------------------------------------------------------------------------------------------------------------------------------------------------------------------------------------------------------------------------------------------------------------|---------------------------------------------------------------------------------------------------------------------------------------------------------------------------------------------------------------------------------------------------------------------------------------------------------------------------------------------------------------------------------------------------------------------|------------|
|                        |                          | Sex: Intervention 18%, control 22% female<br>Ethnicity: not reported                                                                                                                                                                                                  | Intensity: (1) $\geq 50\%$ based on the relation between maximal heart rate and maximal oxygen uptake for at least 40 minutes<br>(2) $\geq 80\%$ of estimated maximal oxygen uptake during three periods of 3-4 minutes engaging large muscle groups for training the central circulation<br>Modality: Aerobic exercise, group training. Strength training also included. Supervised by specialised physiotherapist |            |
| Todd & Ballantyne 1992 | UK<br>Single centre RCT  | CHD – stable angina<br>N= 40 (intervention 20, control 20)<br>Age: Intervention: 53 (range 45-60), Control: 51 (range 37-60) years<br>Sex: 0 female<br>Ethnicity: not reported                                                                                        | Exercise only<br>Home-based, with weekly centre-based sessions early on in the programme<br>Duration: 1 year, 7 sessions/week, 11 minutes/session<br>Intensity: progressive, no further information.<br>Modality: calisthenics, no resistance training. Initial in-hospital sessions supervised by physiotherapist, otherwise no supervision.                                                                       | Usual care |
| Toobert et al. 1998    | USA<br>Single centre RCT | CHD<br>N=28 (intervention 16, control 12)<br>Age: Intervention: 64 $\pm$ 9, Control: 62 $\pm$ 11 years<br>Sex: 100% female<br>Ethnicity: Intervention group: Caucasian 94%, Native American, Alaskan 6%, Hispanic 0%, African American 0%, Other 0%<br>Control group: | Comprehensive rehabilitation – exercise, cooking classes, stress management, group discussions<br>Centre-based<br>Duration: 24 months, daily sessions, then at least 3 sessions/week, 1 hour/session.<br>Intensity: Individually prescribed based on treadmill test, no further details<br>Modality: Aerobic exercises or walking, no resistance training included. Supervised by exercise physiologist.            | Usual care |

|                                |                                  |                                                                                                                                                                                                                                                                                                               |                                                                                                                                                                                                                                                                                                                                                                                    |                                                                                                                                                 |
|--------------------------------|----------------------------------|---------------------------------------------------------------------------------------------------------------------------------------------------------------------------------------------------------------------------------------------------------------------------------------------------------------|------------------------------------------------------------------------------------------------------------------------------------------------------------------------------------------------------------------------------------------------------------------------------------------------------------------------------------------------------------------------------------|-------------------------------------------------------------------------------------------------------------------------------------------------|
|                                |                                  | Caucasian 83%, Native American, Alaskan 0%, Hispanic 8%, African American 0%, Other 8%                                                                                                                                                                                                                        |                                                                                                                                                                                                                                                                                                                                                                                    |                                                                                                                                                 |
| Van den Berg-Emons et al. 2004 | Netherlands<br>Single centre RCT | HF<br>Intervention group: LVEF – 23.9 ± 9.4%, NYHA class II/III – 56/44%.<br>Control group: LVEF – 27.6±6%, NYHA II/III – 63/37%<br>N= 34 (intervention 18, control 16)<br>Age: Intervention: 58.6 ± 12.1, Control: 58.6 ± 10.6 years<br>Sex: intervention 33%, control 19% female<br>Ethnicity: not reported | Exercise only<br>Centre-based<br>Duration: 3 months, 2 sessions/week, 1 hour/session<br>Intensity: Individually prescribed target heart rate (resting HR + (60% difference between resting and maximal HR)<br>Modality: Aerobic exercise, predominantly cycling, walking and games. No resistance training included, supervision not described.                                    | Standard medical treatment without special advice for activities                                                                                |
| Wall et al. 2009               | USA<br>Single centre RCT         | HF<br>LVEF ≤60%, mean not reported.<br>NYHA class – Intervention 2±0, Control 2.13±0.13.<br>N= 19 (intervention 9, control 10)<br>Age: Intervention: 69 ± 4.44, Control: 70 ± 4.05 years<br>Sex: intervention 33.3%, control 50% female)<br>Ethnicity: 100% white.                                            | Comprehensive rehabilitation - Exercise and education (nutrition, medication, disease management and monitoring symptom changes and disease status<br>Home-based<br>Duration: 12 months, 3 sessions/week, >15 mins/session.<br>Intensity: not reported<br>Modality: Aerobic exercise, treadmill. No resistance training included. Supervised by cardiac rehabilitation specialist. | 12 month outpatient, home-based, multidisciplinary disease management programme, which included multiple home visits and follow-up phone calls. |
| Wang et al. 2016               | Singapore<br>Single centre RCT   | CHD – MI<br>N=128 (intervention 64, control 64)<br>Age: Intervention: 54.9±8.7, Control: 55.8±10.3 years<br>Sex: intervention 9.4%, control 10.9% female<br>Ethnicity: not reported                                                                                                                           | Comprehensive rehabilitation – exercise plan and education booklet focussed on psychologically related content (relaxation, stress management, CHD symptom monitoring)<br>Home-based<br>Duration: not described<br>Intensity: not described                                                                                                                                        | Usual care                                                                                                                                      |

|                          |                             |                                                                                                                                                                                                                                                                   | Modality: not described                                                                                                                                                                                                                                                                                                                                                                                                                                                                        |                                                                                                                                                                                                                                                                                                              |
|--------------------------|-----------------------------|-------------------------------------------------------------------------------------------------------------------------------------------------------------------------------------------------------------------------------------------------------------------|------------------------------------------------------------------------------------------------------------------------------------------------------------------------------------------------------------------------------------------------------------------------------------------------------------------------------------------------------------------------------------------------------------------------------------------------------------------------------------------------|--------------------------------------------------------------------------------------------------------------------------------------------------------------------------------------------------------------------------------------------------------------------------------------------------------------|
| West et al. 2012         | UK<br>Multicentre RCT       | CHD – AMI<br>N= 1813 (intervention 903, control 913)<br>Age: Intervention: 64.2±11.2,<br>Control: 64.7±10.9 years<br>Sex: intervention 27.4%, control 25.6% female<br>Ethnicity: not reported                                                                     | Comprehensive rehabilitation – exercise, health education and counselling<br>Centre-based<br>Duration: 6-8 weeks, 1-2 sessions/week, averaged 20 hours over 6-8 weeks<br>Intensity: not described<br>Modality: Warm up, cool down and used exercise equipment in physiotherapy gyms, no further information. Use of resistance training not described. In most centres led by nurses with previous acute cardiac care experience, and in a few by occupational therapists or physiotherapists. | All patients in the trial had similar care in all respects other than referral to cardiac rehabilitation, receiving available explanatory booklets, being advised to see their GP and attend routine outpatient follow up, with referral for further cardiac investigations or interventions as appropriate. |
| Willenheimer et al. 2001 | Sweden<br>Single centre RCT | HF<br>Intervention: LVEF 0.35±0.12, NYHA class 2.1±0.7. Control: LVEF 0.38±0.10, NYHA class 2.4±0.7<br>N= 54 (intervention 17, control 20)<br>Age: Intervention: 64±5, Control:64±8 years<br>Sex: intervention 29%, control 30% female<br>Ethnicity: not reported | Exercise only<br>Centre-based<br>Duration: 16 weeks, 2 sessions/week increasing to 3 after week 7. 15 mins/session increasing to 45.<br>Intensity: 80% peak VO2 ±5bpm. Or RPE 15 (Borg scale, for those with AF)<br>Modality: cycle ergometer, interval training. No resistance training included. Supervised by physiotherapist.                                                                                                                                                              | Asked not to change their degree of physical activity during the active study period                                                                                                                                                                                                                         |
| Witham et al. 2007       | UK<br>Single centre RCT     | HF<br>NYHA class II/III – 56%/44%<br>LV systolic dysfunction:<br>Mild 35%, Moderate 30%, Severe 34%<br>N= 82 (intervention 41, control 41)<br>Age: Intervention: 80±6, Control:81±4 years                                                                         | Exercise only<br>Centre-based, then home-based<br>Duration: 6 months, 2-3 sessions/week, 20 minutes/session<br>Intensity: Borg scale RPE 11-13<br>Modality: Chair based aerobic exercise. No resistance training included. Supervised by physiotherapist during centre-based phase.                                                                                                                                                                                                            | Usual care with no special instructions regarding exercise                                                                                                                                                                                                                                                   |

|                     |                              |                                                                                                                                                                                                                                                                                             |                                                                                                                                                                                                                                                                                                                                                                                                                                                                                                                                                            |                                                                                                                                                                    |
|---------------------|------------------------------|---------------------------------------------------------------------------------------------------------------------------------------------------------------------------------------------------------------------------------------------------------------------------------------------|------------------------------------------------------------------------------------------------------------------------------------------------------------------------------------------------------------------------------------------------------------------------------------------------------------------------------------------------------------------------------------------------------------------------------------------------------------------------------------------------------------------------------------------------------------|--------------------------------------------------------------------------------------------------------------------------------------------------------------------|
|                     |                              | Sex: intervention 37%, control 54% female<br>Ethnicity: not reported                                                                                                                                                                                                                        |                                                                                                                                                                                                                                                                                                                                                                                                                                                                                                                                                            |                                                                                                                                                                    |
| Witham et al. 2012  | UK<br>Single centre RCT      | HF<br>LVEF not reported<br>Intervention group: NYHA class II/III – 70/30%. Control group: NYHA class II/III – 89/11%<br>N=107 (intervention 53, control 54)<br>Age: Intervention: 80.4±5.8, Control: 79.5±4.9 years<br>Sex: intervention 34%, control 31% female<br>Ethnicity: not reported | Comprehensive rehabilitation - Exercise, education and psychosocial support<br>Centre-based progressing to home-based<br>Duration: 24 weeks, 2 sessions/week, up to 60 mins/session.<br>Intensity: Not reported other than intensity increased incrementally by raising the number of repetitions and resistance level of elasticated bands.<br>Modality: Shuttle walking and resistance exercises. Centre-based supervised by physiotherapist.                                                                                                            | Usual care – given a booklet with general advice on diet, exercise, and lifestyle. Participants not discouraged from exercise if already in the habit of doing so. |
| Zwisler et al. 2008 | Denmark<br>Single centre RCT | CHF (12%), IHD (58%), HR (30%)<br>N= 770 (intervention 380, control 390)<br>Age: Intervention: median 66 (range 33-91), Control: median 66 (range 29-94) years<br>Sex: Intervention 36%, control 37% female<br>Ethnicity: not reported                                                      | Comprehensive rehabilitation – exercise, education, dietary counselling, smoking cessation, psychosocial support, risk factor management and clinical assessment<br>Centre-based<br>Duration: 6 weeks (12 weeks for HF patients), 2 sessions/week, 90 mins/session.<br>Intensity: 60-85% HRR based on initial bike test and perceived exertion. HF patients exercised at about 50% of the theoretical maximum heart rate.<br>Modality: Mixture of endurance and strengthening training using various upper and lower body modalities. Supervised exercise. | Usual care                                                                                                                                                         |

\*Unless otherwise stated, numbers refer to mean ± standard deviation. RCT=Randomised controlled trial, CHD=coronary heart disease, MI=myocardial infarction, HR=heart rate, AMI=acute myocardial infarction, HF=heart failure, NYHA=New York Heart Association, LVEF=left ventricular ejection fraction,

PA=physical activity, RPE=rating of perceived exertion, LV=left ventricular, CABG=coronary artery bypass graft, PCI=percutaneous coronary intervention, ACS=acute coronary syndrome, CR=cardiac rehabilitation, HRR=heart rate reserve, UAP=unstable angina pectoris, IHD=ischaemic heart disease.
