# Supplementary material for: Cardiac rehabilitation and physical activity: systematic review and meta-analysis
Source: PubMed Central journal article supplement — Heart. 2018 Apr 13;104(17):1394–402. doi: 10.1136/heartjnl-2017-312832 (PMC6109237; doi:10.1136/heartjnl-2017-312832), 2018-04-13
Supplement: heartjnl-2017-312832supp006.pdf [file heartjnl-2017-312832supp006.pdf]

Table 3: Descriptive summary of PA results between intervention and control

| Author (year)      | Class of PA outcome | PA outcome                        | Intervention vs control result<br>% or mean (SD), P-value, unless otherwise stated<br><sup>a</sup> p-value between groups<br><sup>b</sup> p-value between group change<br><sup>c</sup> p-value interaction effect time x group | Categorisation of effect | Comments                                                                       |
|--------------------|---------------------|-----------------------------------|--------------------------------------------------------------------------------------------------------------------------------------------------------------------------------------------------------------------------------|--------------------------|--------------------------------------------------------------------------------|
| Bertie et al. 1992 | Objective           | Mean daily mileage (km)           | 8.2 (0.6) vs 6.6 (0.5), <0.05 <sup>a</sup>                                                                                                                                                                                     | I>C                      |                                                                                |
| Cowie et al. 2011  | Objective           | Steps/day                         | 4849 (2866)* vs 5458 (2678)* vs 4052 (1910), 0.1 <sup>a</sup>                                                                                                                                                                  | I=C                      | *Both intervention groups                                                      |
|                    | Objective           | Upright duration (hours/day)      | 4.32 (1.45)* vs 4.9 (1.78)* vs 3.85 (1.85), 0.29 <sup>a</sup>                                                                                                                                                                  | I=C                      |                                                                                |
|                    | Objective           | Steps/day during extra-long walks | 672 (751)* vs 1264 (1640)* vs 417 (713), 0.05 <sup>a</sup>                                                                                                                                                                     | I>C                      | No significant differences across the three groups for any within group change |
|                    | Objective           | Steps/day during long walks       | 1312 (1224)* vs 1557 (1039)* vs 825 (641), 0.11 <sup>a</sup>                                                                                                                                                                   | I=C                      |                                                                                |
|                    | Objective           | Steps/day during moderate walks   | 2294 (1078)* vs 2291 (867)* vs 1658 (1052), 0.14 <sup>a</sup>                                                                                                                                                                  | I=C                      |                                                                                |
|                    | Objective           | Steps/day during short walks      | 956 (311)* vs 1129 (474)* vs 955 (474), 0.39 <sup>a</sup>                                                                                                                                                                      | I=C                      |                                                                                |
|                    | Objective           | Cadence during extra-long walks   | 95 (65)* vs 98 (57)* vs 70 (57), 0.36 <sup>a</sup>                                                                                                                                                                             | I=C                      |                                                                                |
|                    | Objective           | Cadence during long walks         | 80 (12)* vs 84 (18)* vs 77 (23), 0.95 <sup>a</sup>                                                                                                                                                                             | I=C                      |                                                                                |

|                      |           |                                       |                                                                                                                      |            |                                                                                      |
|----------------------|-----------|---------------------------------------|----------------------------------------------------------------------------------------------------------------------|------------|--------------------------------------------------------------------------------------|
|                      | Objective | Cadence during moderate walks         | 62 (6)* vs 61 (5)* vs 59 (5), 0.39 <sup>a</sup>                                                                      | I=C        |                                                                                      |
|                      | Objective | Cadence during short walks            | 49 (9)* vs 49 (4)* vs 51 (9), 0.81 <sup>a</sup>                                                                      | I=C        |                                                                                      |
| Devi et al. 2014     | Objective | Steps/day                             | Difference at 6 weeks: 497 (2171) vs -861 (2534), 0.02 <sup>b</sup><br>6 months: NR vs NR, 0.15 <sup>b</sup>         | I>C<br>I=C |                                                                                      |
|                      | Objective | Daily EE (kcal)                       | Difference at 6 weeks: 43.94 (271.9) vs -133.01 (302.01), 0.01 <sup>b</sup><br>6 months: NR vs NR, 0.14 <sup>b</sup> | I>C<br>I=C |                                                                                      |
|                      | Objective | Duration of sedentary activity (min)  | Difference at 6 weeks: -7.79 (40.14) vs 23.23 (62.78), 0.01 <sup>b</sup><br>6 months: NR vs NR, 0.2 <sup>b</sup>     | I>C<br>I=C |                                                                                      |
|                      | Objective | Duration of moderate activity (min)   | Difference at 6 weeks: 6.31 (34.37) vs -22.29 (61.34), 0.01 <sup>b</sup><br>6 months: NR vs NR, 0.24 <sup>b</sup>    | I>C<br>I=C |                                                                                      |
| Gottlieb et al. 1999 | Objective | Daily EE (kcal) doubly labelled water | 273 (133) vs NR, NR                                                                                                  | ?          | No significant difference in EE with exercise training<br>Between group not reported |
|                      | Objective | Daily EE (kcal) accelerometer         | 361 (224) vs NR, NR                                                                                                  | ?          |                                                                                      |
| Houle et al. 2011    | Objective | Steps/day                             | 3 months: 9234 (3502) vs 7972 (3828), <0.001 <sup>c</sup>                                                            | I>C        |                                                                                      |
|                      |           |                                       | 12 months: 9850 (3282) vs 7970 (3433), 0.003 <sup>c</sup>                                                            | I>C        |                                                                                      |

|                                |           |                                               |                                                                                                                                                                           |                          |
|--------------------------------|-----------|-----------------------------------------------|---------------------------------------------------------------------------------------------------------------------------------------------------------------------------|--------------------------|
|                                | Objective | % patients active (>7500 average daily steps) | 3 months: NR vs NR, 0.098 <sup>c</sup><br>6 months: 75% vs 41%, 0.01 <sup>c</sup><br>9 months: 68% vs 36%, 0.03 <sup>c</sup><br>12 months: 83% vs 55%, 0.042 <sup>c</sup> | I=C<br>I>C<br>I>C<br>I>C |
| Oliveira et al. 2014           | Objective | Total PA (counts/min)                         | 479.3 (262.9) vs 402.9 (162.8), 0.056 <sup>c</sup>                                                                                                                        | I=C                      |
|                                | Objective | Sedentary (min/day)                           | 372 (66.2) vs 382.5 (85.6), 0.04 <sup>c</sup>                                                                                                                             | I>C                      |
|                                | Objective | Light (min/day)                               | 278.2 (93.2) vs 297.2 (104.9), 0.106 <sup>c</sup>                                                                                                                         | I=C                      |
|                                | Objective | MVPA (min/day)                                | 43 (32.3) vs 35.7 (24.7), 0.301 <sup>c</sup>                                                                                                                              | I=C                      |
| Ribeiro et al. 2012            | Objective | Daily light PA change (min/day)               | 53.3 (94.3) vs -11.1 (120.3), >0.05 <sup>b</sup>                                                                                                                          | I=C                      |
|                                | Objective | Daily moderate PA change (min/day)            | 12.9 (21.3) vs -0.7 (13.4), <0.05 <sup>b</sup>                                                                                                                            | I>C                      |
| Van den Berg-Emons et al. 2004 | Objective | %24hr engaged in dynamic activity             | 9.9 (4.2) vs 7.4 (2.9), >0.05 <sup>b</sup>                                                                                                                                | I=C                      |
|                                | Objective | Body motility (g)                             | 0.026 (0.009) vs 0.02 (0.007), >0.05 <sup>b</sup>                                                                                                                         | I=C                      |
|                                | Objective | Motility during walking (g)                   | 0.18 (0.06) vs 0.18 (0.07), >0.05 <sup>b</sup>                                                                                                                            | I=C                      |
|                                | Objective | Transitions (n)                               | 132 (55) vs 129 (57), >0.05 <sup>b</sup>                                                                                                                                  | I=C                      |
|                                | Objective | Walking periods >10s (n)                      | 318 (109) vs 165 (62), >0.05 <sup>b</sup>                                                                                                                                 | I=C                      |

|                        |            |                               |                                                                                                 |     |
|------------------------|------------|-------------------------------|-------------------------------------------------------------------------------------------------|-----|
|                        | Objective  | Walking periods<br>>5s (n)    | 318 (109) vs 255 (88), >0.05 <sup>b</sup>                                                       | I=C |
| Witham et al.<br>2007  | Objective  | Change in<br>accelerometry    | 3 months (median % (IQR): 18.7 (-27.5 to 51.8) vs 7 (-29.1 to 36.8), 0.51 <sup>b</sup>          | I=C |
|                        |            | counts from<br>baseline       | 6 months (median % (IQR): 2.3 (-11.1 to 46.6) vs -14 (-37.7 to 25.4), 0.036 <sup>b</sup>        | I>C |
|                        |            |                               | 19 months (mean (95% CI)): -5139 (-26859 to 16580) vs -28184 (-56865 to 497), 0.18 <sup>b</sup> | I=C |
| Witham et al.<br>2012  | Objective  | Change in<br>accelerometry    | 8 weeks: 270, 0.97 <sup>b</sup>                                                                 | I=C |
|                        |            | counts exercise vs<br>control | 24 weeks: 7992, 0.42 <sup>b</sup>                                                               | I=C |
| Borland et al.<br>2014 | Objective  | Steps/day                     | 4963 (2950) vs 3063 (2226), 0.351 <sup>b</sup>                                                  | I=C |
|                        | Subjective | IPAQ category                 | 2 (1-3) vs 1 (1-3), 0.008 <sup>b</sup>                                                          | I>C |
|                        | Subjective | IPAQ sitting time<br>(mins)   | 330 (170) vs 423 (173), 0.551 <sup>b</sup>                                                      | I=C |
| Reid et al.<br>2011    | Objective  | Steps/day                     | 7392 (3365) vs 6750 (3366), 0.656 <sup>c</sup>                                                  | I=C |
|                        | Subjective | MVPA (min/week)               | 201.4 (179.8) vs 169.6 (152.6), 0.782 <sup>c</sup>                                              | I=C |
| Astengo et al.<br>2010 | Subjective | Training<br>(days/week)       | 4.5 (1.8) vs 0.1 (0.8), <0.001 <sup>b</sup>                                                     | I>C |
|                        | Subjective | Training<br>(min/session)     | 31 (20) vs 6 (23), <0.001 <sup>b</sup>                                                          | I>C |
| Bengtsson<br>1983      | Subjective | Habits to exercise:           |                                                                                                 |     |

|                      |            |                            |                                                                                     |            |                           |
|----------------------|------------|----------------------------|-------------------------------------------------------------------------------------|------------|---------------------------|
|                      |            | Never exercise             | 10% vs 15%, >0.05 <sup>a</sup>                                                      | I=C        |                           |
|                      |            | 1-2 times/month            | 7% vs 5%, >0.05 <sup>a</sup>                                                        | I=C        |                           |
|                      |            | 1-3 times/month            | 37% vs 38%, >0.05 <sup>a</sup>                                                      | I=C        |                           |
|                      |            | Daily exercise             | 48% vs 43%, >0.05 <sup>a</sup>                                                      | I=C        |                           |
|                      | Subjective | Leisure time exertion:     |                                                                                     |            |                           |
|                      |            | Much less                  | 44% vs 34%, >0.05 <sup>a</sup>                                                      | I=C        |                           |
|                      |            | Rather less                | 24% vs 34%, >0.05 <sup>a</sup>                                                      | I=C        |                           |
|                      |            | Unchanged                  | 29% vs 31%, >0.05 <sup>a</sup>                                                      | I=C        |                           |
|                      |            | Rather more                | 2% vs 0%, >0.05 <sup>a</sup>                                                        | I=C        |                           |
|                      |            | Much more                  | 0% vs 0%, >0.05 <sup>a</sup>                                                        | I=C        |                           |
| Carlsson et al. 1997 | Subjective | Regularly training         | 13% vs 17%, >0.05 <sup>a</sup>                                                      | I=C        |                           |
|                      | Subjective | Sedentary                  | 77% vs 70%, >0.05 <sup>a</sup>                                                      | I=C        |                           |
| DeBusk et al. 1979   | Subjective | Miles/day (mean (SE))      | 2 (0.6)* vs 2.1 (1.6)* vs 2.9 (1.4), <0.05 <sup>a</sup>                             | I<C        | *Both intervention groups |
| Engblom et al. 1992  | Subjective | Exercise 1-2x per week (%) | 6 month: 13% vs 9%, >0.05 <sup>a</sup><br>12 month: 11% vs 10%, >0.05 <sup>a</sup>  | I=C<br>I=C |                           |
|                      | Subjective | Exercise ≥3x per week (%)  | 6 month: 29% vs 29%, >0.05 <sup>a</sup><br>12 month: 31% vs 25%, >0.05 <sup>a</sup> | I=C<br>I=C |                           |
|                      | Subjective | Exercise 15-29 min (%)     | 6 month: 10% vs 6%, >0.05 <sup>a</sup><br>12 month: 8% vs 6%, >0.05 <sup>a</sup>    | I=C<br>I=C |                           |
|                      | Subjective | Exercise 30-59 min (%)     | 6 month: 22% vs 22%, >0.05 <sup>a</sup><br>12 month: 19% vs 14%, >0.05 <sup>a</sup> | I=C<br>I=C |                           |

|                    |            |                                            |                                                                                                                                              |            |                                   |
|--------------------|------------|--------------------------------------------|----------------------------------------------------------------------------------------------------------------------------------------------|------------|-----------------------------------|
|                    | Subjective | Exercise ≥60 min (%)                       | 6 month: 10% vs 10%, >0.05 <sup>a</sup><br>12 month: 15% vs 15%, >0.05 <sup>a</sup>                                                          | I=C<br>I=C |                                   |
|                    | Subjective | No regular exercise (%)                    | 6 month: 58% vs 62%, >0.05 <sup>a</sup><br>12 month: 58% vs 65%, >0.05 <sup>a</sup>                                                          | I=C<br>I=C |                                   |
| Erdman et al. 1986 | Subjective | Patients undertaking habitual exercise (%) | 6 months: 86% vs 33%, 0.01 <P< 0.001 <sup>a</sup><br>5 years: 52% vs 33%, 0.01 <P< 0.001 <sup>a</sup>                                        | I>C<br>I>C |                                   |
| Gulanick 1991      | Subjective | Walk (score)                               | 4 week: 13.5 (4.9)* vs 11 (3.5)* vs 10.3 (3.4), >0.05 <sup>a</sup><br>9 week: 17.2 (4.4)* vs 14.6 (3.9)* vs 15.8 (5.3), >0.05 <sup>a</sup>   | I=C<br>I=C | *Both intervention groups         |
|                    | Subjective | Climb (score)                              | 4 week: 11.4 (5.3)* vs 10.4 (2.4)* vs 9.2 (3.7), >0.05 <sup>a</sup><br>9 week: 14.3 (5)* vs 13.2 (2.5)* vs 12.3 (4.9), >0.05 <sup>a</sup>    | I=C<br>I=C | All groups sig. decreased         |
|                    | Subjective | Lift (score)                               | 4 week: 9.9 (5.4)* vs 9.1 (5.2)* vs 7.5 (3.3), >0.05 <sup>a</sup><br>9 week: 15.5 (4.3)* vs 15.5 (6.8)* vs 12.7 (5.6), >0.05 <sup>a</sup>    | I=C<br>I=C | (p<0.001) from before hospital to |
|                    | Subjective | Chores (score)                             | 4 week: 13.6 (3.8)* vs 14.1 (2.9)* vs 13.2 (3), >0.05 <sup>a</sup><br>9 week: 16.9 (3.1)* vs 17.7 (2.7)* vs 15.9 (2.9), >0.05 <sup>a</sup>   | I=C<br>I=C | 4 weeks recovery (except for      |
|                    | Subjective | Social (score)                             | 4 week: 13 (4.5)* vs 13.8 (2.8)* vs 10.9 (1.6), >0.05 <sup>a</sup><br>9 week: 18.8 (3.8)* vs 17.2 (2.8)* vs 17.3 (4.2), >0.05 <sup>a</sup>   | I=C<br>I=C | walking). All groups sig.         |
|                    | Subjective | Drive (score)                              | 4 week: 12.8 (5.1)* vs 11.5 (2.7)* vs 10.4 (2.8), >0.05 <sup>a</sup><br>9 week: 19.4 (3.9)* vs 16.3 (3.8)* vs 15.7 (4.3), >0.05 <sup>a</sup> | I=C<br>I=C | increased (p<0.001) from 4        |
|                    | Subjective | Sex (score)                                | 4 week: 9.6 (5.2)* vs 7.8 (4.4)* vs 7.3 (2.8), >0.05 <sup>a</sup><br>9 week: 14.6 (6.8)* vs 12.5 (6.2)* vs 10 (4.8), >0.05 <sup>a</sup>      | I=C<br>I=C | weeks to 9 weeks recovery.        |
|                    | Subjective | Total (score)                              | 4 week: 83.8 (28)* vs 77.5 (13.9)* vs 68.4 (13), >0.05 <sup>a</sup>                                                                          | I=C        |                                   |

|                         |            |                                                 |                                                                                            |            |                                                                                       |
|-------------------------|------------|-------------------------------------------------|--------------------------------------------------------------------------------------------|------------|---------------------------------------------------------------------------------------|
|                         |            |                                                 | 9 week: 116.4 (24.3)* vs 106 (17.7)* vs 97 (20.9), >0.05 <sup>a</sup>                      | I=C        | All groups sig. increased walking (p<0.001) from before hospital to 9 weeks recovery. |
| Hämäläinen et al. 1989  | Subjective | % patients taking moderate to vigorous exercise | NR vs NR, >0.05 <sup>a</sup>                                                               | I=C        |                                                                                       |
| Hambrecht et al. 1993   | Subjective | EE in leisure time PA (kcal/week)               | 1876 (163) vs 1187 (97), <0.001 <sup>a</sup>                                               | I>C        |                                                                                       |
| Heath et al. 1987       | Subjective | Kcal/week                                       | 2549 (970)* vs 2058 (800)* vs 1089 (795), <0.01 <sup>a</sup>                               | I>C        | *Both intervention groups                                                             |
| Higgins et al. 2001     | Subjective | % patients currently exercising                 | 10 weeks: 88% vs 59%, <0.01 <sup>a</sup><br>51 weeks: 72% vs 61%, >0.05 <sup>a</sup>       | I>C<br>I=C |                                                                                       |
| Lidell & Fridlund. 1996 | Subjective | % patients physically exercising                | 1 year: 66.7% vs 27.6%, <0.001 <sup>a</sup><br>5 years: 40.9% vs 27.5%, 0.112 <sup>a</sup> | I>C<br>I=C |                                                                                       |
| Maddison et al. 2015    | Subjective | Total PA (min/week)                             | 1555 (NR) vs 1321.1 (NR), 0.22 <sup>a</sup>                                                | I=C        |                                                                                       |
|                         | Subjective | Leisure time PA (min/week)                      | 383.2 (NR) vs 273 (NR), 0.04 <sup>a</sup>                                                  | I>C        |                                                                                       |

|                          |            |                                                 |                                                                                                                |            |                               |
|--------------------------|------------|-------------------------------------------------|----------------------------------------------------------------------------------------------------------------|------------|-------------------------------|
|                          | Subjective | Walking<br>(min/week)                           | 512.3 (NR) vs 360.9 (NR), 0.02 <sup>a</sup>                                                                    | I>C        |                               |
|                          | Subjective | Sitting time<br>(min/week)                      | NR vs NR, >0.05 <sup>a</sup>                                                                                   | I=C        |                               |
| Mueller et al.<br>2007   | Subjective | Current<br>recreational activity<br>(kcal/week) | 2704 (1970) vs 2085 (1522), 0.4 <sup>a</sup>                                                                   | I=C        |                               |
| Naser et al.<br>2008     | Subjective | % exercising<br>vigorously 20min<br>3x per week | 88% vs 20%, <0.05 <sup>a</sup>                                                                                 | I>C        |                               |
| Oldenberg et<br>al. 1995 | Subjective | Exercise<br>classification                      | Both groups' level of activity generally changed over time<br>(Z=3.52, p<0.001)                                | ?          | Between group<br>not reported |
| Ornish et al.<br>1998    | Subjective | Exercise<br>(times/week)                        | 1 year: 4.97 (0.35) vs 2.87 (0.7), 0.06 <sup>b</sup><br>5 years: 4.34 (0.49) vs 3.57 (0.56), 0.64 <sup>b</sup> | I=C<br>I=C |                               |
|                          | Subjective | Exercise<br>(hours/week)                        | 1 year: 5.02 (0.61) vs 2.52 (0.7), 0.12 <sup>b</sup><br>5 years: 3.56 (0.56) vs 2.9 (0.65), 0.5 <sup>b</sup>   | I=C<br>I=C |                               |
| Otterstad et<br>al. 2003 | Subjective | % exercising<br>>1hr/week                       | 6 months: 93% vs 72%, <0.001 <sup>a</sup><br>2 years: 67% vs 46%, <0.01 <sup>a</sup>                           | I>C<br>I>C |                               |
|                          | Subjective | % no exercise                                   | 2 years: 7% vs 22%, <0.01 <sup>a</sup>                                                                         | I>C        |                               |
| Senden et al.<br>2005    | Subjective | DPA score                                       | 13.2 (7.5) vs 12.8 (7.3), >0.05 <sup>a</sup>                                                                   | I=C        |                               |
| Sivarajan et<br>al. 1982 | Subjective | MET level                                       | 3 months: 5 (NR)* vs 4.6 (NR)* vs 4.3 (NR), NR                                                                 | ?          | *Both intervention<br>groups  |
|                          |            |                                                 | 6 months: 5.2 (NR)* vs 5 (NR)* vs 4.7 (NR), NR                                                                 | ?          |                               |

|                        |            |                                                      |                                                                                                                                                                                                              |                               |                                                                    |
|------------------------|------------|------------------------------------------------------|--------------------------------------------------------------------------------------------------------------------------------------------------------------------------------------------------------------|-------------------------------|--------------------------------------------------------------------|
|                        | Subjective | Max walking distance (miles)                         | 3 months: 2.4 (NR)* vs 2.2 (NR)* vs 1.5 (NR), <0.001***a,<br><0.01***a<br>6 months: NR* vs NR* vs NR, <0.04***a, >0.05***a                                                                                   | I>C<br>I>C<br>(exercise only) | ** Exercise only vs control<br>***<br>exercise/teaching vs control |
| Ståhle et al. 1999     | Subjective | Self-estimated PA                                    | 3 months (difference): 1.4 (1.2) vs 0.7 (1.0), <0.01 <sup>b</sup><br>12 months (difference): 0.7 (1.0) vs 0.4 (1.1), >0.05 <sup>b</sup><br>3-6 years (median (range)): 4 (3-6) vs 4 (1-6), 0.06 <sup>a</sup> | I>C<br>I=C<br>I=C             |                                                                    |
| Todd & Ballantyne 1992 | Subjective | Self-reported PA                                     | NR vs NR, >0.05 <sup>a</sup>                                                                                                                                                                                 | I=C                           |                                                                    |
| Toobert et al. 1998    | Subjective | Stanford 7 day recall (kcal/day)                     | 4 months: 164 (101) vs 128 (87), 0.497 <sup>a</sup><br>12 months: 198 (99) vs 138 (76), 0.307 <sup>a</sup>                                                                                                   | I=C<br>I=C                    |                                                                    |
|                        | Subjective | Summary of self-care activities (days exercise/week) | 4 months: 4.8 (1) vs 2.4 (1.1), 0.00 <sup>a</sup><br>12 months: 4.5 (1.6) vs 2.5 (1.8), 0.03 <sup>a</sup><br>24 months: 3.7 (2) vs 2.7 (1.6), 0.005 <sup>a</sup>                                             | I>C<br>I>C<br>I>C             |                                                                    |
| Wall et al. 2009       | Subjective | Vigorous activity index score change (mean (SE))     | 6 months: 1.88 (7.25) vs 2.14 (3.06), >0.05 <sup>a</sup><br>12 months: 6.88 (8.34) vs 2.86 (2.86), >0.05 <sup>a</sup>                                                                                        | I=C<br>I=C                    |                                                                    |
|                        | Subjective | Leisurely walking index score change                 | 6 months: 1,78 (2.32) vs 1.71 (2.45), >0.05 <sup>a</sup><br>12 months: 4.89 (3.25) vs 1.71 (2.74), >0.05 <sup>a</sup>                                                                                        | I=C<br>I=C                    |                                                                    |

|                          |            |                             |                                                                                                                      |            |                      |
|--------------------------|------------|-----------------------------|----------------------------------------------------------------------------------------------------------------------|------------|----------------------|
|                          | Subjective | Moving index score change   | 6 months: 0.33 (1.17) vs 0.3 (1.22), >0.05 <sup>a</sup><br>12 months: 1 (0.71) vs 0.9 (0.46), >0.05 <sup>a</sup>     | I=C<br>I=C |                      |
|                          | Subjective | Standing index score change | 6 months: -0.02 (0.4) vs 0.25 (0.25), >0.05 <sup>a</sup><br>12 months: -0.89 (0.35) vs 0 (0), <0.05 <sup>a</sup>     | I=C<br>I>C |                      |
|                          | Subjective | Sitting index score change  | 6 months: 0.33 (0.44) vs -0.1 (0.28), >0.05 <sup>a</sup><br>12 months: 0.11 (0.39) vs 0.1 (0.41), >0.05 <sup>a</sup> | I=C<br>I=C |                      |
|                          | Subjective | Total index score change    | 6 months: 3.89 (7.52) vs 2.8 (5.13), >0.05 <sup>a</sup><br>12 months: 11.22 (7.86) vs 2.4 (4.2), >0.05 <sup>a</sup>  | I=C<br>I=C |                      |
| Wang et al. 2016         | Subjective | MIDAS PA score              | 9.27 (9.71) vs 14.63 (11.09), 0.02 <sup>c</sup>                                                                      | I>C        | Low score favourable |
| West et al. 2012         | Subjective | % exercising >100kcal/day   | 9% vs 12%, <0.05 <sup>a</sup>                                                                                        | I<C        |                      |
| Willenheimer et al. 2001 | Subjective | PA score                    | 4 months: 60 (85) vs 42 (55), 0.507 <sup>b</sup><br>10 months: 48 (41) vs 32 (41), 0.481 <sup>b</sup>                | I=C<br>I=C |                      |
| Zwisler et al. 2008      | Subjective | % PA <4 hours per week      | 34% vs 43%, 0.01 <sup>a</sup>                                                                                        | I>C        |                      |

PA=physical activity, EE=energy expenditure, NR=not reported, MVPA=moderate-vigorous physical activity, IPAQ=international physical activity questionnaire, IQR=interquartile range, CI=confidence interval, SE=standard error, MET=metabolic equivalent.

#### Effect categorisations:

I=C: no statistical difference in PA between intervention and control

I>C: PA statistically superior in intervention compared to control

I<C: PA statistically superior in intervention compared to control

?: between group not reported, difference between intervention and control uncertain
