# Supplementary material for: Cardiac rehabilitation and physical activity: systematic review and meta-analysis
Source: PubMed Central journal article supplement — Heart. 2018 Apr 13;104(17):1394–402. doi: 10.1136/heartjnl-2017-312832 (PMC6109237; doi:10.1136/heartjnl-2017-312832), 2018-04-13
Supplement: heartjnl-2017-312832supp007.pdf [file heartjnl-2017-312832supp007.pdf]

*Appendix Table 4: vote counting – subjective vs objective PA measures*

| <b>Direction of result</b>                                           | <b>Number of results</b> |                                 |                                   |
|----------------------------------------------------------------------|--------------------------|---------------------------------|-----------------------------------|
|                                                                      | <b>All studies</b>       | <b>Objective PA method used</b> | <b>Subjective PA methods used</b> |
| PA in CR same as control (P>0.05)                                    | 100 (69%)                | 30 (65%)                        | 70 (71%)                          |
| PA in CR higher than control (P≤0.05)                                | 38 (26%)                 | 14 (31%)                        | 24 (24%)                          |
| PA in control higher than CR (P≤0.05)                                | 2 (1%)                   | 0                               | 2 (2%)                            |
| PA difference between CR and control not clear (no P-value reported) | 5 (3%)                   | 2 (4%)                          | 3 (3%)                            |
| <b>Total</b>                                                         | <b>145</b>               | <b>46</b>                       | <b>99</b>                         |
