# Supplementary material for: Cardiac rehabilitation and physical activity: systematic review and meta-analysis
Source: PubMed Central journal article supplement — Heart. 2018 Apr 13;104(17):1394–402. doi: 10.1136/heartjnl-2017-312832 (PMC6109237; doi:10.1136/heartjnl-2017-312832), 2018-04-13
Supplement: heartjnl-2017-312832supp008.pdf [file heartjnl-2017-312832supp008.pdf]

Appendix Table 5: vote counting – comparing statistical methods

| Direction of result                                                  | Number of results |                                  |                                    |                                  |
|----------------------------------------------------------------------|-------------------|----------------------------------|------------------------------------|----------------------------------|
|                                                                      | All studies       | P-value between group difference | P-value between group change in PA | P-value interaction time x group |
| PA in CR same as control (P>0.05)                                    | 100 (69%)         | 70 (75%)                         | 24 (71%)                           | 6 (46%)                          |
| PA in CR higher than control (P≤0.05)                                | 38 (26%)          | 21 (23%)                         | 10 (29%)                           | 7 (54%)                          |
| PA in control higher than CR (P≤0.05)                                | 2 (1%)            | 2 (2%)                           | 0                                  | 0                                |
| PA difference between CR and control not clear (no P-value reported) | 5 (3%)            | NA                               | NA                                 | NA                               |
| <b>Total</b>                                                         | <b>145</b>        | <b>93</b>                        | <b>34</b>                          | <b>13</b>                        |
