# Supplementary material for: Cardiac rehabilitation and physical activity: systematic review and meta-analysis
Source: PubMed Central journal article supplement — Heart. 2018 Apr 13;104(17):1394–402. doi: 10.1136/heartjnl-2017-312832 (PMC6109237; doi:10.1136/heartjnl-2017-312832), 2018-04-13
Supplement: heartjnl-2017-312832supp009.pdf [file heartjnl-2017-312832supp009.pdf]

Appendix Table 6: vote counting – comparing diagnoses

| Direction of result                                                        | Number of results |          |               |         |
|----------------------------------------------------------------------------|-------------------|----------|---------------|---------|
|                                                                            | All studies       | CHD      | Heart failure | Both    |
| PA in CR same as control<br>(P>0.05)                                       | 100 (69%)         | 62 (63%) | 36 (86%)      | 2 (40%) |
| PA in CR higher than<br>control (P≤0.05)                                   | 38 (26%)          | 31 (32%) | 4 (10%)       | 3 (60%) |
| PA in control higher than<br>CR (P≤0.05)                                   | 2 (1%)            | 2 (2%)   | 0             | 0       |
| PA difference between<br>CR and control not clear<br>(no P-value reported) | 5 (3%)            | 3 (3%)   | 2 (4%)        | 0       |
| Total                                                                      | 145               | 98       | 42            | 5       |
