# Supplementary material for: Cardiac rehabilitation and physical activity: systematic review and meta-analysis
Source: PubMed Central journal article supplement — Heart. 2018 Apr 13;104(17):1394–402. doi: 10.1136/heartjnl-2017-312832 (PMC6109237; doi:10.1136/heartjnl-2017-312832), 2018-04-13
Supplement: heartjnl-2017-312832supp010.pdf [file heartjnl-2017-312832supp010.pdf]

*Appendix Table 8: vote counting – sensitivity analysis, removing frequency of exercise outcomes, and removing studies pre-1990*

| <b>Direction of result</b>                                           | <b>Number of results</b> |                                                                  |                                 |
|----------------------------------------------------------------------|--------------------------|------------------------------------------------------------------|---------------------------------|
|                                                                      | <b>All studies</b>       | <b>PA outcome results based on frequency of exercise removed</b> | <b>Pre-1990 studies removed</b> |
| PA in CR same as control (P>0.05)                                    | 100 (69%)                | 70 (67%)                                                         | 90 (71%)                        |
| PA in CR higher than control (P≤0.05)                                | 38 (26%)                 | 29 (28%)                                                         | 33 (26%)                        |
| PA in control higher than CR (P≤0.05)                                | 2 (1%)                   | 1 (1%)                                                           | 1 (1%)                          |
| PA difference between CR and control not clear (no P-value reported) | 5 (3%)                   | 4 (4%)                                                           | 3 (2%)                          |
| <b>Total</b>                                                         | <b>145</b>               | <b>104</b>                                                       | <b>127</b>                      |
