# Supplementary material for: Cardiac rehabilitation and physical activity: systematic review and meta-analysis
Source: PubMed Central journal article supplement — Heart. 2018 Apr 13;104(17):1394–402. doi: 10.1136/heartjnl-2017-312832 (PMC6109237; doi:10.1136/heartjnl-2017-312832), 2018-04-13
Supplement: heartjnl-2017-312832supp011.pdf [file heartjnl-2017-312832supp011.pdf]

*Appendix Table 7: vote counting – comparing dose of exercise (dose units = weeks of exercise training x average sessions/week x average duration of session (minutes))*

| Direction of result                                                  | Number of results      |                  |
|----------------------------------------------------------------------|------------------------|------------------|
|                                                                      | Dose $\geq 2000$ units | Dose <2000 units |
| PA in CR same as control (P>0.05)                                    | 24 (56%)               | 55 (85%)         |
| PA in CR higher than control (P $\leq$ 0.05)                         | 16 (37%)               | 8 (12%)          |
| PA in control higher than CR (P $\leq$ 0.05)                         | 1 (2%)                 | 1 (1.5%)         |
| PA difference between CR and control not clear (no P-value reported) | 2 (5%)                 | 1 (1.5%)         |
| <b>Total</b>                                                         | <b>43</b>              | <b>65</b>        |
