# Supplementary material for: Cardiac rehabilitation and physical activity: systematic review and meta-analysis
Source: PubMed Central journal article supplement — Heart. 2018 Apr 13;104(17):1394–402. doi: 10.1136/heartjnl-2017-312832 (PMC6109237; doi:10.1136/heartjnl-2017-312832), 2018-04-13
Supplement: heartjnl-2017-312832supp012.pdf [file heartjnl-2017-312832supp012.pdf]

Appendix Table 9: vote counting – comparing CR intervention type

| Direction of result                                                  | Number of results |                            |                               |
|----------------------------------------------------------------------|-------------------|----------------------------|-------------------------------|
|                                                                      | All studies       | Exercise only intervention | Comprehensive CR intervention |
| PA in CR same as control (P>0.05)                                    | 100 (69%)         | 25 (61%)                   | 75 (72%)                      |
| PA in CR higher than control (P≤0.05)                                | 38 (26%)          | 13 (32%)                   | 25 (24%)                      |
| PA in control higher than CR (P≤0.05)                                | 2 (1%)            | 1 (2%)                     | 1 (1%)                        |
| PA difference between CR and control not clear (no P-value reported) | 5 (3%)            | 2 (5%)                     | 3 (3%)                        |
| <b>Total</b>                                                         | <b>145</b>        | <b>41</b>                  | <b>104</b>                    |
